# Supplementary material
Source: publisher site journal article supplement (https://www.dovepress.com/get_supplementary_file.php?f=497183.docx)
Supplement: Supplementary file 1 [file get_supplementary_file.php]

***Supplementary file 1***

***Data collection procedure details***

Data were collected at three distinct time points within the semester to capture variations in the constructs of interest under different levels of academic stress:

***Start of the Semester (Baseline Assessment):*** The first data collection occurred during the first week of the spring semester (Week 1). This time point was chosen to establish a baseline measure when academic stress levels are typically low, and students begin settling into their routines.

***Immediately After Mid-Term Exams (Post-Midterm Assessment):*** The second wave of data was collected immediately after the mid-term exams (Week 9). This time point aimed to capture the acute effects of mid-term stress and assess how these stress levels impact bedtime procrastination, cognitive reappraisal, and sleep quality. By assessing immediately after the exams, this wave provides insight into students' coping strategies and their impact on sleep and bedtime behaviors following a significant academic stressor.

***Two Weeks Before Final Exams (Pre-Final Assessment):*** The third data collection took place two weeks before the final exams (Week 15). This period represents a phase of sustained academic pressure, where stress levels are high, and students are preparing for finals. This time point allows for assessing how prolonged stress affects bedtime procrastination, cognitive reappraisal, and sleep quality as students approach the culmination of the semester.

***Recruitment, Advertisement, and Participation Campaign***

Students were recruited through a comprehensive advertising and campaigning strategy to maximize participation and ensure diverse representation across all disciplines. The campaign included multiple channels:

***Email Invitations***

The primary recruitment method was personalized email invitations sent to all enrolled students by the university administration. These emails provided an overview of the study, its importance, and the benefits of participating, including a link to the online survey platform.

***Social Media Campaigns***

The study was promoted on various social media platforms, including the university's official Facebook, Instagram, and Twitter accounts. Posts included engaging graphics, concise descriptions of the study's purpose, and reminders to participate. Updates and reminders were posted regularly to maintain awareness throughout the study period.

***On-Campus Flyers and Posters***

Flyers and posters were displayed at strategic locations around the campus, such as libraries, cafeterias, student lounges, and faculty offices, to capture students' attention during their daily activities. These materials included a QR code linking directly to the online survey.

***Classroom Announcements***

Faculty members were requested to make brief classroom announcements to encourage participation. This approach helped reach a broad student audience and provided a personal touch to the recruitment effort.

***Student Ambassadors***

A team of student ambassadors from different disciplines was recruited to promote the study among their peers. These ambassadors shared information through word-of-mouth and social media, creating a sense of community engagement and trust.

***Incentives and Follow-Up Reminders***

Participants who completed all three waves of data collection were eligible to enter a draw for a small incentive (e.g., gift vouchers). Follow-up reminders were sent via email and social media to encourage participation in subsequent waves of data collection.

This multi-faceted recruitment approach ensured maximum reach and engagement with the student population, resulting in a robust sample size for the study.

***Demographics characteristics details***

**Table S1:** Demographic characteristics of the study participants (n=403)

| ***Participants*** | ***n*** | ***%*** |
| --- | --- | --- |
| Age (years) | 23.42 ± 4.2 |  |
| Gender |  |  |
| Male | 168 | 41.69% |
| Female | 235 | 58.31% |
| Place of residence |  |  |
| On-campus | 297 | 73.70% |
| Off-campus | 106 | 26.30% |
| Marital status |  |  |
| Single | 341 | 84.62% |
| Married/Divorced | 62 | 15.38% |
| Socioeconomic status |  |  |
| Low | 122 | 30.28% |
| Middle | 203 | 50.37% |
| High | 78 |  |
| Year of study |  |  |
| Bachelors | 140 | 34.74% |
| Masters | 201 | 49.88% |
| PhD | 62 | 15.38% |
| Field of study |  |  |
| STEM | 134 | 33.25% |
| Humanities and Social Sciences | 167 | 41.44% |
| Professional Studies | 102 | 25.31% |

Note: STEM: Science, Technology, Engineering, and Mathematics. Humanities and Social Sciences: This group combines fields from both the humanities (such as Literature, History, Philosophy, Arts) and the social sciences (such as Psychology, Sociology, Political Science, Economics). Professional Studies: This category includes applied and professional disciplines like Business, Health Sciences (Nursing, Medicine, Pharmacy), and Education.

***Panel Attrition***

**Table S2:** Dropout analysis between participants at *P1* and *P3*

|  | ***Participants at P1*** | ***Participants at P3*** |  | ***Sig.*** |
| --- | --- | --- | --- | --- |
|  | ***N=1912*** | ***N=403*** |  |  |
| Age (years) | 23.03 | 23.42 | 1.03 | > 0.05 |
| Gender |  |  | 1.64 | > 0.05 |
| Male |  |  |  |  |
| Female |  |  |  |  |
| Place of residence | 1.15 | 1.32 | 0.76 | > 0.05 |
| On-campus |  |  |  |  |
| Off-campus |  |  |  |  |
| Marital status | 1.26 | 1.35 | 0.98 | > 0.05 |
| Single |  |  |  |  |
| Married/Divorced |  |  |  |  |
| Socioeconomic status | 2.56 | 2.43 | 1.23 | > 0.05 |
| Low |  |  |  |  |
| Middle |  |  |  |  |
| High |  |  |  |  |
| Year of study | 2.34 | 2.56 | 1.16 | > 0.05 |
| Bachelors |  |  |  |  |
| Masters |  |  |  |  |
| PhD |  |  |  |  |
| Field of study | 2.16 | 2.38 | 1.06 | > 0.05 |
| STEM |  |  |  |  |
| Humanities and Social Sciences |  |  |  |  |
| Professional Studies |  |  |  |  |
| Bedtime Procrastination (*P1*) | 30.03 | 32.16 | 1.12 | > 0.05 |
| Cognitive Reappraisal (*P1*) | 21.34 | 18.14 | 0.89 | > 0.05 |
| Sleep Quality (*P1*) | 10.72 | 12.70 | 0.73 | > 0.05 |

***Summary of the Full Information Maximum Likelihood (FIML) Results***

To enhance transparency, we have included a summary of the FIML results as a supplementary file. This demonstrates how the FIML method handled missing data and confirms that it did not substantially alter the parameter estimates or compromise the results.

**Step I**

Descriptive Statistics for Available and Missing Data

**Table S3:** Descriptive Statistics Before and After FIML

| *Constructs* | *Time point* | *Before FIML* | *After FIML* |
| --- | --- | --- | --- |
| Bedtime Procrastination | P1 | M = 24.56, SD = 5.51 | M = 24.58, SD = 5.49 |
|  | P2 | M = 27.82, SD = 7.23 | M = 27.83, SD = 7.20 |
|  | P3 | M = 32.16, SD = 11.73 | M = 32.17, SD = 11.71 |
| Cognitive Reappraisal | P1 | M = 23.34, SD = 6.13 | M = 23.36, SD = 6.11 |
|  | P2 | M = 20.53, SD = 5.07 | M = 20.55, SD = 5.05 |
|  | P3 | M = 18.14, SD = 2.35 | M = 18.15, SD = 2.34 |
| Sleep Quality | P1 | M = 4.4, SD = 2.62 | M = 4.6, SD = 2.61 |
|  | P2 | M = 6.1, SD = 2.94 | M = 6.3, SD = 2.93 |
|  | P3 | M = 12.7, SD = 5.17 | M = 12.8, SD = 5.15 |

The "Before FIML" column reflects the statistics based on complete cases (only participants who completed all three waves).

The "After FIML" column reflects the statistics after FIML was applied, including all available data (participants with partial data included).

**Step II**

Little’s MCAR test

| Statistics | df | P-value |
| --- | --- | --- |
| 878.94 | 672 | 0.152 |

Little’s MCAR test was conducted to evaluate the missing data mechanism for the observed variables. The test yielded a non-significant result (p>0.05), indicating that the data are likely Missing Completely at Random (MCAR). This supports using full information maximum likelihood (FIML) estimation to handle missing data.

**Step III**

Model Estimates with and without FIML

**Table S:** Path estimates with and without FIML

| Path | Estimate (Complete Cases: n = 403) | Estimate (FIML: n = 1912) |
| --- | --- | --- |
| BPP1 → BPP2 | β = 0.619, p<0.001 | β = 0.616, p<0.001 |
| BPP2 → BPP3 | β = 0.658, p<0.001 | β = 0.655, p<0.001 |
| CRP1 → CRP2 | β = 0.581, p<0.001 | β = 0.579, p<0.001 |
| CRP2 → CRP3 | β = 0.493, p<0.001 | β = 0.490, p<0.001 |
| SQP1 → SQP2 | β = 0.659, p<0.001 | β = 0.657, p<0.001 |
| SQP2 → SQP3 | β = 0.612, p<0.001 | β = 0.609, p<0.001 |
| BPP1 → CRP2 | β = -0.169, p<0.05 | β = -0.166, p<0.01 |
| CRP2 → SQP3 | β = 0.177, p<0.01 | β = 0.175, p<0.001 |
| BPP1 → SQP3 | β = -0.359, p<0.001 | β = -0.357, p<0.001 |

**Step IV**

Model fit indices with and without FIML

| Model | Data | RMSEA | SRMR | CFI | TLI |
| --- | --- | --- | --- | --- | --- |
| Measurement model | Complete cases (403) | 0.042 | 0.038 | 0.98 | 0.97 |
|  | FIML (1912) | 0.038 | 0.036 | 0.99 | 0.99 |
| Stability model | Complete cases (403) | 0.039 | 0.037 | 0.99 | 0.96 |
|  | FIML (1912) | 0.035 | 0.034 | 1.00 | 0.97 |
| Autoregressive mediation model | Complete cases (403) | 0.040 | 0.038 | 0.98 | 0.95 |
|  | FIML (1912) | 0.037 | 0.035 | 1.00 | 0.97 |

***Post-hoc power analysis and bootstrapped confidence intervals for autoregressive and cross-lagged effects***

| Paths | Estimate β | SE | P-value | 95% bootstrapped CI | Power (1-β) |
| --- | --- | --- | --- | --- | --- |
| BPP1 → BPP2 | β = 0.617 | 0.04 | <0.001 | 0.587,0.698 | 0.98 |
| BPP2 → BPP3 | β = 0.656 | 0.03 | <0.001 | 0.549,0.703 | 0.96 |
| CRP1 → CRP2 | β = 0.580 | 0.03 | <0.001 | 0.473,0.652 | 0.98 |
| CRP2 → CRP3 | β = 0.492 | 0.02 | <0.001 | 0.328,0.512 | 0.97 |
| SQP1 → SQP2 | β = 0.658 | 0.04 | <0.001 | 0.556,0.722 | 0.98 |
| SQP2 → SQP3 | β = 0.610 | 0.05 | <0.001 | 0.583,0.692 | 0.98 |
| BPP1 → CRP2 | β = -0.617 | 0.06 | <0.01 | -0.745, -0.564 | 0.89 |
| CRP2 → SQP3 | β = 0.176 | 0.03 | <0.001 | 0.097,0.234 | 0.96 |
| BPP1 → SQP3 | β = -0.358 | 0.02 | <0.05 | -0.451, -0.409 | 0.81 |
